# Supplementary material
Source: Frontiers journal article supplement (https://www.frontiersin.org/articles/257259)
Supplement: Table_2.PDF [file Table_2.PDF]

## Supplementary Material

### Article Title Transcription factors in fungi: TFome dynamics, three major families, and dual-specificity TFs

Ekaterina Shelest\*

\* **Correspondence:** ekaterina.shelest@leibniz-hki.de

**Table S2.** Major taxonomic assignments of the TF-like DBD families found in fungi and Microsporidia. **A.** TFDFs found in fungi and microsporidia in trace amounts (1-5 species). The second column of the section A shows the taxonomic assignment and number of species (in the parentheses) possessing the found TFDFs. Abbreviations: A - ascomycetes, B - Basidiomycetes, Z - Zygomycetes, C - Chitrids, M - Microsporidia. For details, consult Suppl. Table S3. **B.** TFDFs reliably detected in fungal and microsporidial genomes (>5 TFs per species).

| IPR ID                                      | Domain name                                    | Found in*                      |
|---------------------------------------------|------------------------------------------------|--------------------------------|
| <b>A. Rare DBDFs (found in 1-5 species)</b> |                                                |                                |
| IPR004210                                   | BESS motif                                     | A(4),B(1) Metazoa              |
| IPR011539                                   | Rel homology                                   | A(3),B(2) Metazoa              |
| IPR013019                                   | MAD homology, MH1                              | A(2) Metazoa                   |
| IPR013854                                   | Transcription factor AP-2, C-terminal          | B(1) Metazoa                   |
| IPR001628                                   | Zinc finger, nuclear hormone receptor-type     | Z(2) Metazoa                   |
| IPR013524                                   | Acute myeloid leukemia 1 (AML 1)/Runx          | B(1) Metazoa                   |
| IPR009508                                   | Churchill                                      | C(1) Metazoa                   |
| IPR009638                                   | Fez1                                           | A(1) Metazoa                   |
| IPR003350                                   | Homeodomain protein CUT                        | B(1) Metazoa                   |
| IPR002546                                   | Myogenic basic muscle-specific protein         | B(1) Metazoa                   |
| IPR000770                                   | SAND                                           | B(1) Metazoa+Viridiplantae     |
| IPR005735                                   | Zinc finger, LSD1-type                         | A(4) Viridiplantae, plant-spec |
| IPR003441                                   | No apical meristem (NAM) protein               | A(2),B(3) Viridiplantae        |
| IPR003340                                   | Transcription factor B3                        | A(1) Viridiplantae, plant-spec |
| IPR007050                                   | HTH_10, Bacterio-opsin activator               | A(1) Archea                    |
| IPR002831                                   | Transcriptional regulator TrmB                 | A(1) Bacteria/ Archea          |
| IPR006199                                   | LexA DNA-binding region                        | A(3),B(2) Bacteria             |
| IPR000524                                   | Bacterial regulatory protein GntR, HTH         | A(1),Z(1),M(2) Bacteria        |
| IPR000847                                   | Bacterial regulatory protein, LysR             | A(2),Z(1),M(1) Bacteria        |
| IPR002481                                   | Ferric-uptake regulator                        | A(3),Z(1) Bacteria             |
| IPR007985                                   | Haemolysin expression modulating, HHA          | B(2),Z(2) Bacteria             |
| IPR013199                                   | HTH Mga                                        | B(2),Z(1) Bacteria             |
| IPR013196                                   | Helix-turn-helix, type 11                      | A(1),Z(2) Bacteria             |
| IPR007911                                   | Flagellar transcriptional activator            | A(1),Z(1) Bacteria             |
| IPR007737                                   | M trans-acting positive regulator              | A(1),Z(1) Bacteria             |
| IPR000831                                   | Trp repressor                                  | A(1),B(1) Bacteria             |
| IPR002577                                   | Helix-turn-helix, HxIR type                    | A(1),M(1) Bacteria             |
| IPR005569                                   | Arc-like DNA binding                           | Z(1) Bacteria                  |
| IPR010330                                   | Competence-induced protein CoiA-like           | A(1) Bacteria                  |
| IPR013198                                   | GTP-sensing helix-turn-helix, CodY, C-terminal | A(1) Bacteria                  |

|                                                             |                                                                     |                |                                                                     |
|-------------------------------------------------------------|---------------------------------------------------------------------|----------------|---------------------------------------------------------------------|
| IPR010312                                                   | GTP-sensing transcriptional pleiotropic repressor CodY, N-terminal  | A(1)           | Bacteria                                                            |
| IPR000281                                                   | HTH_6, Helix-turn-helix protein RpiR                                | A(1)           | Bacteria                                                            |
| IPR007492                                                   | LytTr DNA-binding region                                            | A(1)           | Bacteria                                                            |
| IPR004356                                                   | P pili regulatory PapB protein                                      | Z(1)           | Bacteria                                                            |
| IPR005650                                                   | Penicillinase repressor                                             | A(1)           | Bacteria                                                            |
| IPR001867                                                   | Signal transduction response regulator, C-terminal                  | A(2),Z(1),M(1) | Bacteria                                                            |
| IPR009300                                                   | Transcriptional activator RinB                                      | A(1)           | Bacteria / Viruses                                                  |
| IPR003176                                                   | Viral DNA-binding protein                                           | A(3),B(1),Z(1) | Viruses                                                             |
| IPR003174                                                   | Alpha trans-inducing protein (Alpha-TIF)                            | B(2),Z(2)      | Viruses                                                             |
| IPR015241                                                   | TF MotA, C-terminal, bacteriophage                                  | B(2),C(1)      | Viruses                                                             |
| IPR007031                                                   | Poxvirus late transcription factor VLTf3 like                       | C(2)           | Viruses                                                             |
| IPR006834                                                   | VITF-3 subunit protein                                              | A(1)           | Viruses                                                             |
| <b>B. DBDFs typically found in fungi (in &gt;5 species)</b> |                                                                     |                |                                                                     |
| IPR001138                                                   | Zn_cluster                                                          |                | FUNGAL+Various eukar groups, 1-5 species in each                    |
| IPR003163                                                   | APSES                                                               |                | FUNGAL                                                              |
| IPR001083                                                   | Copper fist DNA-binding                                             |                | FUNGAL                                                              |
| IPR006856                                                   | Mating-type protein MAT alpha 1                                     |                | FUNGAL                                                              |
| IPR012340                                                   | Nucleic acid-binding, OB-fold                                       |                | ALL but not true fungi so far: Found in Opisthokonta incertae sedis |
| IPR001471                                                   | Pathogenesis-related transcriptional factor and ERF, DNA-binding    |                | ALL but not metazoans                                               |
| IPR001387                                                   | Helix-turn-helix type 3                                             |                | ALL but mainly bacteria                                             |
| IPR007889                                                   | Helix-turn-helix, Psq                                               |                | ALL (eukar+bact)                                                    |
| IPR009057                                                   | Homeodomain-like                                                    |                | ALL                                                                 |
| IPR009061                                                   | Putative DNA binding                                                |                | ALL                                                                 |
| IPR002059                                                   | Cold-shock protein, DNA-binding                                     |                | ALL                                                                 |
| IPR018004                                                   | KilA, N-terminal/APSES-type HTH, DNA-binding                        |                | ALL                                                                 |
| IPR009044                                                   | ssDNA-binding transcriptional regulator                             |                | All eukar (plants)                                                  |
| IPR008895                                                   | YL1 nuclear                                                         |                | All eukar (Metazoa)                                                 |
| IPR007604                                                   | CP2 transcription factor                                            |                | Ichthyosporea, Nucleariidae and Fonticulagroup, Choanoflagellida    |
| IPR012294                                                   | Transcription factor TFIIID, C-terminal/DNA glycosylase, N-terminal |                | ?                                                                   |
| IPR005011                                                   | SART-1 protein                                                      |                | Eukar-ubiquitous                                                    |
| IPR010770                                                   | SGT1                                                                |                | Eukar-ubiquitous                                                    |
| IPR003958                                                   | Transcription factor CBF/NF-Y/archaeal histone                      |                | Eukar+Archea                                                        |
| IPR000814                                                   | TATA-box binding                                                    |                | Eukar+Archea+(Viruses only 3)                                       |
| IPR004827                                                   | Basic-leucine zipper (bZIP) transcription factor                    |                | Eukar - various                                                     |
| IPR001289                                                   | CCAAT-binding transcription factor, subunit B                       |                | Eukar - various                                                     |
| IPR007196                                                   | CCR4-Not complex component, Not1                                    |                | Eukar - various                                                     |
| IPR003150                                                   | DNA-binding RFX                                                     |                | Eukar - various                                                     |
| IPR016177                                                   | DNA-binding, integrase-type                                         |                | Eukar - various                                                     |
| IPR001878                                                   | Zinc finger, CCHC-type                                              |                | All eukar+viruses (only 13)                                         |
| IPR025659                                                   | Tubby C-terminal-like domain                                        |                | All eukar (mostly plants)                                           |
| IPR007087                                                   | Zinc finger, C2H2-type                                              |                | All eukar                                                           |
| IPR000571                                                   | Zinc finger, CCCH-type                                              |                | All eukar                                                           |
| IPR000679                                                   | Zinc finger, GATA-type                                              |                | All eukar                                                           |
| IPR004823                                                   | TATA box binding protein associated factor (TAF)                    |                | All eukar                                                           |
| IPR004181                                                   | Zinc finger, MIZ-type                                               |                | All eukar                                                           |
| IPR013932                                                   | TATA-binding protein interacting (TIP20)                            |                | All eukar                                                           |
| IPR000967                                                   | Zinc finger, NF-X1-type                                             |                | All eukar                                                           |
| IPR010666                                                   | Zinc finger, GRF-type                                               |                | All eukar                                                           |
| IPR003656                                                   | Zinc finger, BED-type predicted                                     |                | All eukar                                                           |
| IPR004198                                                   | Zinc finger, C5HC2-type                                             |                | All eukar                                                           |
| IPR013921                                                   | TATA-binding related factor                                         |                | All eukar                                                           |
| IPR000007                                                   | Tubby, C-terminal                                                   |                | All eukar                                                           |
| IPR002653                                                   | Zinc finger, A20-type                                               |                | All eukar                                                           |
| IPR000197                                                   | Zinc finger, TAZ-type                                               |                | All eukar                                                           |
| IPR001766                                                   | Fork head transcription factor                                      |                | All eukar                                                           |

|           |                                                             |                                                   |
|-----------|-------------------------------------------------------------|---------------------------------------------------|
| IPR000232 | Heat shock factor (HSF)-type, DNA-binding                   | All eukar                                         |
| IPR002100 | Transcription factor, MADS-box                              | All eukar                                         |
| IPR011598 | Helix-loop-helix DNA-binding                                | All eukar                                         |
| IPR004022 | DDT                                                         | All eukar                                         |
| IPR009395 | GCN5-like 1                                                 | All eukar                                         |
| IPR003316 | Transcription factor E2F/dimerisation partner (TDP)         | All eukar                                         |
| IPR000818 | TEA/ATTS                                                    | Metazoa+Fungi (some other eukar in trace amounts) |
| IPR024061 | NDT80 DNA-binding domain                                    | Fungi+Metazoa                                     |
| IPR001356 | Homeobox                                                    | Metazoa                                           |
| IPR008967 | p53-like transcription factor, DNA-binding                  | metazoa                                           |
| IPR008917 | Eukaryotic transcription factor, Skn-1-like                 | Metazoa                                           |
| IPR015988 | STAT transcription factor, coiled coil                      | Metazoa                                           |
| IPR000418 | Ets                                                         | Metazoa                                           |
| IPR003902 | Transcriptional regulator, GCM-like                         | metazoa                                           |
| IPR001523 | Paired box protein, N-terminal                              | Metazoa                                           |
| IPR001275 | DM DNA-binding                                              | Metazoa                                           |
| IPR010919 | SAND-like                                                   | Metazoa                                           |
| IPR001699 | Transcription factor, T-box                                 | Metazoa                                           |
| IPR004826 | Maf transcription factor                                    | Metazoa                                           |
| IPR000327 | POU-specific                                                | Metazoa                                           |
| IPR006780 | YABBY protein                                               | Plants+Fungi                                      |
| IPR004333 | Transcription factor, SBP-box                               | Plants only                                       |
| IPR003657 | DNA-binding WRKY                                            | Plant                                             |
| IPR004645 | DNA-binding protein Tfx                                     | archaea                                           |
| IPR000944 | Transcriptional regulator, Rrf2                             | Bacteria+archaea                                  |
| IPR010985 | Ribbon-helix-helix                                          | Bacteria+archaea                                  |
| IPR000005 | Helix-turn-helix, AraC type                                 | Bacteria                                          |
| IPR010982 | Lambda repressor-like, DNA-binding                          | Bacteria                                          |
| IPR002197 | Helix-turn-helix, Fis-type                                  | Bacteria                                          |
| IPR000792 | Bacterial regulatory protein, LuxR                          | Bacteria                                          |
| IPR000843 | Bacterial regulatory protein, LacI                          | Bacteria                                          |
| IPR016032 | Signal transduction response regulator, C-terminal effector | Bacteria                                          |
| IPR000835 | Bacterial regulatory protein, MarR                          | Bacteria                                          |
| IPR010921 | Trp repressor/replication initiator                         | Bacteria                                          |
| IPR001845 | Bacterial regulatory protein, ArsR                          | Bacteria                                          |
| IPR000551 | Bacterial regulatory protein, MerR                          | Bacteria                                          |
| IPR001034 | Bacterial regulatory protein, DeoR N-terminal               | Bacteria                                          |
| IPR001808 | Bacterial regulatory protein, Crp                           | Bacteria                                          |

\* - in addition to fungi.
